# Supplementary material for: Developmental Strategy and Validation of the Midwifery Interventions Classification (MIC): A Delphi Study Protocol and Results from the Developmental Phase
Source: MDPI journal article supplement (doi:10.3390/healthcare11060919), 2023-03-22
Supplement: s1 [file s1]

**Table S1.** Overview of the data extraction for generating a preliminary MIC from the literature review

| First author and year of publication | Geographic area | Study design         | Objective                                                                                                                                                                                                                                            | Category/domain           | Class | Midwifery interventions                                                                                                                                                                                                                                                                                                                                                                              |
|--------------------------------------|-----------------|----------------------|------------------------------------------------------------------------------------------------------------------------------------------------------------------------------------------------------------------------------------------------------|---------------------------|-------|------------------------------------------------------------------------------------------------------------------------------------------------------------------------------------------------------------------------------------------------------------------------------------------------------------------------------------------------------------------------------------------------------|
| Alliman et al., 2019 [41]            | USA             | Descriptive analysis | To explore the medical and social risk factors, care processes, and quality outcomes of Medicaid beneficiaries in the AABC Strong Start sample compared with publicly reported US data in order to inform future research and Medicaid policy reform | Ancillary Services        | //    | Laboratory tests<br>Social services and nutrition consultants<br>Notification and referral for pediatric care                                                                                                                                                                                                                                                                                        |
|                                      |                 |                      |                                                                                                                                                                                                                                                      | Birth center/Primary care | //    | Registration and orientation<br>Informed consent<br>History and physical<br>Antepartum care<br>Counseling/Education<br>Continuous screening<br>Admission to the birth center for labor<br>Birth center<br>Postpartum care<br>Newborn care<br>Education<br>Discharge<br>2-3 day home visit<br>7-10 day office visit<br>4-6 week exam<br>Family planning<br>Breastfeeding support<br>Parenting support |
|                                      |                 |                      |                                                                                                                                                                                                                                                      | Hospital/Physician care   | //    | OB consultation<br>Antepartum referral<br>Intrapartum referral<br>Hospital birth<br>Postpartum or newborn referral<br>Discharge                                                                                                                                                                                                                                                                      |

|                            |       |                     |                                                                                                                                                                    |                                         |    |                                                                                                                                                                                                                                                                                                                                                                                                                                     |
|----------------------------|-------|---------------------|--------------------------------------------------------------------------------------------------------------------------------------------------------------------|-----------------------------------------|----|-------------------------------------------------------------------------------------------------------------------------------------------------------------------------------------------------------------------------------------------------------------------------------------------------------------------------------------------------------------------------------------------------------------------------------------|
| Blanc et al.,<br>2016 [40] | Kenya | Observational study | To assess the validity of a large set of maternal and newborn health indicators that are included or have the potential to be included in population-based surveys | Initial client assessment               | // | Woman referred to the facility because of a problem<br>Provider washes hands with soap and water or uses antiseptic before initial examination<br>Takes blood pressure                                                                                                                                                                                                                                                              |
|                            |       |                     |                                                                                                                                                                    | Provide respectful care                 | // | Woman allowed to drink liquids or eat<br>Encourages/assists woman to ambulate during labor<br>Encourages/assists woman to assume different positions in labor<br>Woman are allowed to have a support person during labor and delivery<br>Support companion present during the birth                                                                                                                                                 |
|                            |       |                     |                                                                                                                                                                    | First stage of labor                    | // | Induces labor with uterotonic<br>Augments labor with uterotonic<br>Uterotonics received (labor induction or augmentation)<br>Membranes ruptured (labor induction or augmentation)                                                                                                                                                                                                                                                   |
|                            |       |                     |                                                                                                                                                                    | Skilled birth attendance                | // | Main provider labor nurse/midwife<br>Main provider delivery doctor (ob/gyn)/medical resident<br>Main provider delivery student nurse                                                                                                                                                                                                                                                                                                |
|                            |       |                     |                                                                                                                                                                    | Second and third stage labor            | // | Episiotomy performed<br>Uterotonic received following delivery of the placenta                                                                                                                                                                                                                                                                                                                                                      |
|                            |       |                     |                                                                                                                                                                    | Immediate postnatal newborn care        | // | Baby is given to mother immediately after birth<br>Baby placed skin-to-skin immediately on the mother<br>Breastfeeding within the first hour of birth<br>3 elements of essential newborn care (immediately dried, on mother's skin, breastfed within the first hour)<br>3 elements of essential newborn care (immediately dried, 2 items on mother's skin, breastfeeding within the first hour)<br>Low birthweight newborn (<2500g) |
|                            |       |                     |                                                                                                                                                                    | Immediate postnatal care for the mother | // | Palpates uterus 15 min after delivery of the placenta<br>First post-delivery exam, the provider asks/ checks for bleeding<br>First post-delivery exam, the provider examines the perineum                                                                                                                                                                                                                                           |

|                              |     |                     |                                                                                  |                  |                   |    |                                                              |
|------------------------------|-----|---------------------|----------------------------------------------------------------------------------|------------------|-------------------|----|--------------------------------------------------------------|
| Butcher et al.,<br>2020 [33] | USA | Observational study | Organizing nursing interventions and activities in a complete and systematic way | Basic physiology | Maternal outcomes | // | First post-delivery exam, the provider takes the temperature |
|                              |     |                     |                                                                                  |                  |                   |    | First post-delivery exam, the provider takes blood pressure  |
|                              |     |                     |                                                                                  |                  |                   |    | First post-delivery exam, the provider checks for involution |
|                              |     |                     |                                                                                  |                  |                   |    | Woman asked for pain relief medication during her stay       |
|                              |     |                     |                                                                                  |                  |                   |    | Woman received pain relief medication                        |
|                              |     |                     |                                                                                  |                  |                   |    | Cesarean section performed                                   |
|                              |     |                     |                                                                                  |                  |                   |    | Reason for cesarean section - prolonged/obstructed labor     |
|                              |     |                     |                                                                                  |                  |                   |    | Complications (bleeding, prolonged labor, none)              |
|                              |     |                     |                                                                                  |                  |                   |    | Promotion of physical activity                               |
|                              |     |                     |                                                                                  |                  |                   |    | Management of activity and physical exercise                 |
|                              |     |                     |                                                                                  |                  |                   |    | Management of elimination                                    |
|                              |     |                     |                                                                                  |                  |                   |    | Support in managing bowel function                           |
|                              |     |                     |                                                                                  |                  |                   |    | Management of urinary elimination                            |
|                              |     |                     |                                                                                  |                  |                   |    | Education on proper urinary habits                           |
|                              |     |                     |                                                                                  |                  |                   |    | Nutrition                                                    |
|                              |     |                     |                                                                                  |                  |                   |    | Nutrition                                                    |
|                              |     |                     |                                                                                  |                  |                   |    | Self-care assistance: nutrition                              |
|                              |     |                     |                                                                                  |                  |                   |    | Nutritional counseling                                       |
|                              |     |                     |                                                                                  |                  |                   |    | Pain management                                              |
|                              |     |                     |                                                                                  |                  |                   |    | Pain management                                              |
|                              |     |                     |                                                                                  |                  |                   |    | Massage                                                      |
|                              |     |                     |                                                                                  |                  |                   |    | Environmental Management: wellbeing                          |
|                              |     |                     |                                                                                  |                  |                   |    | Nutrition                                                    |
|                              |     |                     |                                                                                  |                  |                   |    | Nutrition                                                    |
|                              |     |                     |                                                                                  |                  |                   |    | Self-care assistance                                         |
|                              |     |                     |                                                                                  |                  |                   |    | Perineal care                                                |
|                              |     |                     |                                                                                  |                  |                   |    | Self-care assistance: bathing/personal hygiene               |
|                              |     |                     |                                                                                  |                  |                   |    | Administration of analgesics                                 |
|                              |     |                     |                                                                                  |                  |                   |    | Administration of medication                                 |
|                              |     |                     |                                                                                  |                  |                   |    | Administration of medication                                 |

|          |                                |                                                                                                                                                                                                                                                                                                                                                                                 |
|----------|--------------------------------|---------------------------------------------------------------------------------------------------------------------------------------------------------------------------------------------------------------------------------------------------------------------------------------------------------------------------------------------------------------------------------|
|          |                                | Medication management                                                                                                                                                                                                                                                                                                                                                           |
|          | Perioperative assistance       | Intraoperative positioning<br>Administration of anesthesia<br>Post-anesthesia care<br>Preoperative coordination<br>Assistance during surgery<br>Management of surgical instruments<br>Preventive measures in case of surgery<br>Preparation for surgery<br>Regulation of intraoperative temperature<br>Teaching: preoperative period<br>Infection control: intraoperative phase |
|          | Management of skin/wounds      | Care of the incision site<br>Suturing<br>Wound care                                                                                                                                                                                                                                                                                                                             |
|          | Thermoregulation               | Temperature regulation                                                                                                                                                                                                                                                                                                                                                          |
|          | Management of tissue perfusion | Preventive measures for bleeding<br>Reduction of bleeding<br>Reduction of antepartum uterine bleeding<br>Reduction of postpartum bleeding<br>Capillary blood sampling<br>Venous cannulation<br>Intravenous therapy<br>Blood sampling: venous blood sample                                                                                                                       |
| Behavior | Behavioral therapy             | Support in behavior management<br>Support in behavior modification<br>Sharing of goals<br>Contract with the patient<br>Assistance in smoking cessation                                                                                                                                                                                                                          |

|        |                                      |                                                             |
|--------|--------------------------------------|-------------------------------------------------------------|
|        |                                      | Prevention of substance abuse                               |
|        | Cognitive therapy                    | Facilitation of learning                                    |
|        | Improvement of communication         | Active listening                                            |
|        |                                      | Improvement of socialization                                |
|        | Coping assistance                    | Preventive guidance in critical situations                  |
|        |                                      | Improvement of coping                                       |
|        |                                      | Counseling                                                  |
|        |                                      | Sexual counseling                                           |
|        |                                      | Support in decision-making                                  |
|        |                                      | Emotional support                                           |
|        |                                      | Facilitation of grief processing: perinatal death           |
|        |                                      | Presence                                                    |
|        |                                      | Improvement of safety                                       |
|        |                                      | Enhancement of self-awareness                               |
|        |                                      | Improvement of self-efficacy                                |
|        |                                      | Improvement of self-esteem                                  |
|        | Patient education                    | Health education                                            |
|        |                                      | Improvement of health literacy                              |
|        |                                      | Facilitation of learning                                    |
|        |                                      | Improvement of readiness to learn                           |
|        |                                      | Parent education: child in the first year of life           |
|        |                                      | Teaching: preoperative period                               |
|        |                                      | Teaching: nutrition of the child from 0 to 3 months of life |
|        |                                      | Teaching: safety of the child from 0 to 3 months of life    |
|        |                                      | Family planning: contraception                              |
|        | Promotion of psychological wellbeing | Guided visualization                                        |
| Safety | Crisis management                    | Management of severity codes                                |
|        |                                      | Emergency assistance                                        |

|        |                      |                                                                                                                                                                                                                                                                                                                                                                                                                                                                                                                                                                                                                                |
|--------|----------------------|--------------------------------------------------------------------------------------------------------------------------------------------------------------------------------------------------------------------------------------------------------------------------------------------------------------------------------------------------------------------------------------------------------------------------------------------------------------------------------------------------------------------------------------------------------------------------------------------------------------------------------|
|        |                      | First aid                                                                                                                                                                                                                                                                                                                                                                                                                                                                                                                                                                                                                      |
|        |                      | Triage: emergency center                                                                                                                                                                                                                                                                                                                                                                                                                                                                                                                                                                                                       |
|        |                      | Telephone triage                                                                                                                                                                                                                                                                                                                                                                                                                                                                                                                                                                                                               |
|        | Risk management      | <hr/> Allergy management<br>Environment management<br>Environment management: safety<br>Prevention of falls<br>Screening<br>Vaccination management<br>Latex use precautions<br>Infection control<br>Identification of the assisted person<br>Surveillance<br>Monitoring of vital parameters<br><hr/>                                                                                                                                                                                                                                                                                                                           |
| Family | Pregnancy assistance | <hr/> Assistance to the person: pregnancy<br>Reduction of antepartum uterine bleeding<br>Reduction of postpartum bleeding<br>Facilitation of grief processing: perinatal death<br>Identification of risks: family expecting a child<br>Surveillance: post-term pregnancy<br>Assistance during childbirth<br>Preparation for childbirth<br>Electronic fetal monitoring: antepartum<br>Electronic fetal monitoring: intrapartum<br>Family planning: contraception<br>Assistance to the child: newborn<br>Intrapartum assistance<br>Intrapartum assistance: high-risk childbirth<br>Labor induction<br>Labor suppression<br><hr/> |

|                   |                                                  |                                                             |
|-------------------|--------------------------------------------------|-------------------------------------------------------------|
|                   |                                                  | Lactation suppression                                       |
|                   |                                                  | Non-nutritive sucking                                       |
|                   |                                                  | Phototherapy: newborn                                       |
|                   |                                                  | Postpartum and puerperium assistance                        |
|                   |                                                  | Prenatal assistance                                         |
|                   |                                                  | Resuscitation: fetus                                        |
|                   |                                                  | Resuscitation: newborn                                      |
|                   |                                                  | Obstetric ultrasound                                        |
|                   |                                                  | Promotion of the integrity of the family expecting a child  |
|                   |                                                  |                                                             |
|                   | Assistance in child growth                       | Bottle feeding                                              |
|                   |                                                  | Breastfeeding counseling                                    |
|                   |                                                  | Parent education: child in the first year of life           |
|                   |                                                  | Teaching: nutrition of the child from 0 to 3 months of life |
|                   |                                                  | Teaching: safety of the child from 0 to 3 months of life    |
|                   |                                                  | Promotion of parent-child attachment                        |
|                   |                                                  | Cup feeding: newborn                                        |
|                   |                                                  | Promotion of parenting role                                 |
|                   | Assistance throughout life                       | Empowerment of the role                                     |
|                   |                                                  | Support to the caregiver                                    |
|                   |                                                  | Promotion of family involvement                             |
|                   |                                                  | Support to the family                                       |
| Healthcare system | Sustaining adaptation with the healthcare system | Preoperative coordination                                   |
|                   |                                                  | Support to the decision-making process                      |
|                   |                                                  | Welcome to a healthcare or social facility                  |
|                   |                                                  | Case management                                             |
|                   |                                                  | Cultural mediation                                          |
|                   |                                                  | Guide to the healthcare system                              |
|                   |                                                  | Protection of the rights of the assisted person             |
|                   |                                                  | Discharge planning                                          |
|                   |                                                  | Facilitation of visits                                      |

|                                     |                                                    |
|-------------------------------------|----------------------------------------------------|
| Management of the healthcare system | Emergency cart control                             |
|                                     | Interpretation of laboratory data                  |
|                                     | Peer review                                        |
|                                     | Collaboration with the doctor                      |
|                                     | Improvement of collaboration                       |
|                                     | Tutoring: Staff                                    |
|                                     | Tutoring: Students                                 |
|                                     | Evaluation of equipment                            |
|                                     | Quality monitoring                                 |
|                                     | Management of laboratory samples                   |
|                                     | Staff supervision                                  |
|                                     | Management of supplies                             |
|                                     | Staff development                                  |
|                                     | Management of technology                           |
|                                     | Transfer to another facility                       |
|                                     | Transfer within the facility                       |
|                                     | Management of economic resources                   |
| Management of information           | Surveillance: teleassistance                       |
|                                     | Consultancy                                        |
|                                     | Documentation                                      |
|                                     | Collection of forensic data                        |
|                                     | Exchange of health-related information             |
|                                     | Monitoring of healthcare policy                    |
|                                     | Incident reporting - report on an accidental event |
|                                     | Multidisciplinary care consultancy                 |
|                                     | Prescription: diagnostic test                      |
|                                     | Prescription: non-pharmacological treatment        |
|                                     | Data collection for research purposes              |
|                                     | Shift change communications                        |
|                                     | Telephone consultation                             |



|                          |                                 |                     |                                                                                                                                                                             |                                     |                               |                                                                                                                                                                                                                                                                                                                                                                                                                                                                    |
|--------------------------|---------------------------------|---------------------|-----------------------------------------------------------------------------------------------------------------------------------------------------------------------------|-------------------------------------|-------------------------------|--------------------------------------------------------------------------------------------------------------------------------------------------------------------------------------------------------------------------------------------------------------------------------------------------------------------------------------------------------------------------------------------------------------------------------------------------------------------|
|                          |                                 |                     |                                                                                                                                                                             | Telephone follow-up                 |                               |                                                                                                                                                                                                                                                                                                                                                                                                                                                                    |
|                          |                                 |                     |                                                                                                                                                                             | Community                           | Promotion of community health | Case management<br>Community health development<br>Management of economic resources<br>Health education<br>Monitoring of healthcare policy<br>Management of vaccinations<br>Program development                                                                                                                                                                                                                                                                    |
|                          |                                 |                     |                                                                                                                                                                             |                                     | Management of community risks | Screening<br>Risk identification.                                                                                                                                                                                                                                                                                                                                                                                                                                  |
| Day et al., 2021 [32]    | Bangladesh, Nepal, and Tanzania | Observational study | To assess the validity of indicators of maternal and newborn healthcare coverage around the time of birth in survey data and routine facility register data                 | Labor and delivery ward             | //                            | Uterotonics to prevent postpartum hemorrhage<br>Early initiation of breastfeeding<br>Neonatal resuscitation by bag-mask ventilation                                                                                                                                                                                                                                                                                                                                |
|                          |                                 |                     |                                                                                                                                                                             | Kangaroo mother care ward or corner | //                            | Skin-to-skin contact or kangaroo mother care position between mother and baby                                                                                                                                                                                                                                                                                                                                                                                      |
|                          |                                 |                     |                                                                                                                                                                             | Newborn ward or pediatrics ward     | //                            | Antibiotic treatment for neonatal infection                                                                                                                                                                                                                                                                                                                                                                                                                        |
| Devane et al., 2019 [39] | Ireland                         | Observational study | To report on the development and prioritization of a national suite of Quality Care Metrics (QCM), and their associated indicators, for midwifery care processes in Ireland | //                                  | //                            | Midwifery Plan of Care<br>Booking<br>Abdominal examination (after 24 weeks gestation) on current or last assessment<br>Intrapartum fetal wellbeing<br>Intrapartum fetal wellbeing cardiotocography (CTG)<br>Intrapartum maternal wellbeing<br>Risk assessment for venous thromboembolism (VTE) in pregnancy and the puerperium<br>Immediate post-birth care<br>Communication (Clinical Midwifery Handover)<br>Pain management (other than labor)<br>Infant feeding |

Postnatal care (daily midwifery care processes)  
 Post-birth discharge planning for going home  
 Medication administration  
 Medication, storage, and custody (excluding MDSs)  
 MDA drugs  
 Intravenous fluid therapy  
 Clinical Record Keeping

|                                 |           |                     |                                                                                                                                                                                                                 |                                                    |    |                                                                                                                                                                                                                                                             |
|---------------------------------|-----------|---------------------|-----------------------------------------------------------------------------------------------------------------------------------------------------------------------------------------------------------------|----------------------------------------------------|----|-------------------------------------------------------------------------------------------------------------------------------------------------------------------------------------------------------------------------------------------------------------|
| Diamond-Smith et al., 2022 [31] | Africa    | Literature review   | To summarize and describe respectful maternal care-promoting interventions during childbirth implemented in Africa                                                                                              | Supply-side domains                                | // | Train healthcare personnel<br>Improve facility environment<br>Implement quality improvement programs<br>Enact policies or guidelines<br>Support provider wellness<br>Address other drivers of RMC                                                           |
|                                 |           |                     |                                                                                                                                                                                                                 | Demand-side domains                                | // | Advocate for respectful maternal care<br>Educate women giving birth<br>Engage community members                                                                                                                                                             |
|                                 |           |                     |                                                                                                                                                                                                                 | Combination of both supply and demand side domains | // | Implement social accountability mechanisms                                                                                                                                                                                                                  |
| Escuriet et al., 2015 [38]      | Spain     | Literature review   | To provide a critical literature review on the tools and indicators currently being used to measure the performance of maternity care within Europe and to identify the dominant focus of existing measurements | Process                                            | // | Antenatal care<br>Intrapartum care<br>Postnatal care<br>Neonatal care                                                                                                                                                                                       |
| Flenady et al., 2016 [30]       | Australia | Observational study | To assess the status of global indicators by describing the currently available data to address the WHO Essential Interventions and to develop a robust suite of indicators                                     | Preconception interventions                        | // | Family planning (preconception advice and counseling about the choice of contraception)<br>Prevention and Management of STIs, including HIV for PMTCT of HIV and syphilis<br>Folic acid fortification and/or supplementation to prevent neural tube defects |

|                                                                                                                                        |                                 |    |                                                                                                                                                                                                                                                                                                                                                                                                                                                                                                                                                                                                                                                                                                                                                                                                                                                                                                                                                                                                                                                                                                                                                                                                                             |
|----------------------------------------------------------------------------------------------------------------------------------------|---------------------------------|----|-----------------------------------------------------------------------------------------------------------------------------------------------------------------------------------------------------------------------------------------------------------------------------------------------------------------------------------------------------------------------------------------------------------------------------------------------------------------------------------------------------------------------------------------------------------------------------------------------------------------------------------------------------------------------------------------------------------------------------------------------------------------------------------------------------------------------------------------------------------------------------------------------------------------------------------------------------------------------------------------------------------------------------------------------------------------------------------------------------------------------------------------------------------------------------------------------------------------------------|
| and respective data points to monitor WHO Essential Interventions – both screening and management components – for use in eRegistries. | Antenatal care interventions    | // | Antenatal care essential package (four-visit schedule)<br>Iron and folic acid supplementation during pregnancy<br>Tetanus immunization in pregnancy for preventing neonatal tetanus<br>Prophylactic antimalarial for preventing malaria in pregnancy<br>Insecticide Treated Bednets (ITBN) for preventing malaria in pregnancy<br>Smoking cessation during pregnancy<br>Screening and treatment of syphilis (during pregnancy)<br>Prevention and Management of HIV and prevention of mother-to-child-transmission (PMTCT) in pregnancy<br>Calcium supplementation in pregnancy for preventing pre-eclampsia<br>Low-dose aspirin for preventing pre-eclampsia in high-risk women<br>Antihypertensive drugs for treating severe hypertension in pregnancy<br>Magnesium sulfate to prevent and treat eclampsia<br>External Cephalic Version (>36 weeks) to reduce malpresentation at term<br>Induction of labor for Management of prelabour rupture of membranes (PROM) at term<br>Antibiotics for Management of preterm prelabour rupture of membranes (pPROM)<br>Corticosteroids for prevention of neonatal respiratory distress syndrome (RDS) in preterm labor<br>Safe abortion for the Management of unintended pregnancy |
|                                                                                                                                        | Interventions for care at birth | // | Social support during childbirth<br>Prophylactic antibiotic for cesarean section<br>Cesarean section for maternal/fetal indication (e.g., obstructed labor and central placenta previa)<br>Prophylactic uterotonic/active Management of the third stage to prevent postpartum hemorrhage<br>Induction of labor for prolonged pregnancy<br>Uterotonics for Management of postpartum hemorrhage                                                                                                                                                                                                                                                                                                                                                                                                                                                                                                                                                                                                                                                                                                                                                                                                                               |

Manual removal of placenta (only by professional health workers) for Management of postpartum hemorrhage  
Initiation or continuation of HIV therapy for HIV-positive women

|                                                   |    |                                                                                                                                                                                                                                                                                                                                                                                                                                                                                                                                                                                                        |
|---------------------------------------------------|----|--------------------------------------------------------------------------------------------------------------------------------------------------------------------------------------------------------------------------------------------------------------------------------------------------------------------------------------------------------------------------------------------------------------------------------------------------------------------------------------------------------------------------------------------------------------------------------------------------------|
| Interventions for postpartum care (of the mother) | // | <p>Advice and provision of family planning</p> <p>Prevent, measure, and treat maternal anaemia</p> <p>Detection and Management of postpartum sepsis</p> <p>Screening and initiation or continuation of antiretroviral therapy for HIV</p>                                                                                                                                                                                                                                                                                                                                                              |
| Interventions for newborn care                    | // | <p>Promotion and provision of thermal care for all newborns to prevent hypothermia</p> <p>Promotion and support for early initiation and exclusive breastfeeding (within the first hour)</p> <p>Promotion and provision of hygienic cord and skin care</p> <p>Neonatal resuscitation with a bag and mask for babies who do not breathe at birth</p> <p>Newborn immunization</p> <p>Presumptive antibiotic therapy for newborns at risk of bacterial infection</p> <p>Case management of neonatal sepsis, meningitis, and pneumonia</p> <p>Initiation of ART in babies born to HIV-infected mothers</p> |
| Interventions for small and ill babies            | // | <p>Kangaroo mother care (KMC) for preterm and for &lt;2000g babies</p> <p>Extra support for feeding the small and preterm baby</p> <p>Prophylactic and therapeutic use of surfactant to prevent respiratory distress syndrome in preterm babies</p> <p>Continuous positive airway pressure (CPAP) to manage preterm babies with respiratory distress syndrome</p> <p>Management of newborns with jaundice</p>                                                                                                                                                                                          |
| Childbirth                                        | // | <p>Induction of labor for prolonged pregnancy</p> <p>Prophylactic uterotonics to prevent postpartum hemorrhage</p> <p>Active Management of the third stage of labor to prevent postpartum hemorrhage</p> <p>Management of postpartum hemorrhage (e.g., uterotonics, uterine massage)</p>                                                                                                                                                                                                                                                                                                               |

Cesarean section for maternal/fetal indication  
 Prophylactic antibiotics for cesarean section

|                     |    |                                                                                                |
|---------------------|----|------------------------------------------------------------------------------------------------|
| Postnatal (mother)  | // | Family planning                                                                                |
|                     |    | Prevent and treat maternal anemia                                                              |
|                     |    | Detect and manage postpartum sepsis                                                            |
|                     |    | Screen and initiate or continue antiretroviral therapy for HIV                                 |
| Postnatal (newborn) | // | Immediate thermal care (newborn)                                                               |
|                     |    | Initiation of exclusive breastfeeding (within the first hour)                                  |
|                     |    | Hygienic cord and skin care                                                                    |
|                     |    | Neonatal resuscitation with bag and mask (professional health worker)                          |
|                     |    | Case management of neonatal sepsis, meningitis, and pneumonia                                  |
|                     |    | Kangaroo mother care for preterm and for less than 2000g babies                                |
|                     |    | Management of newborn with jaundice                                                            |
|                     |    | Surfactant to prevent respiratory distress syndrome in preterm babies                          |
|                     |    | Continuous positive airway pressure (CPAP) to manage babies with respiratory distress syndrome |
|                     |    | Extra support for feeding small and preterm babies                                             |
|                     |    | Presumptive antibiotic therapy for newborns at risk of bacterial infections                    |

|                             |       |                   |                                                                                                            |                              |    |                                                                                                                                                                                                                                                   |
|-----------------------------|-------|-------------------|------------------------------------------------------------------------------------------------------------|------------------------------|----|---------------------------------------------------------------------------------------------------------------------------------------------------------------------------------------------------------------------------------------------------|
| Lazzaretto et al., 2018 [2] | Italy | Literature review | To identify the recommended intrapartum care indicators in order to measure the quality of midwifery care. | General midwifery procedures | // | Coping with pain<br>Intrapartum Interventions<br>Free maternal position<br>Cesarean section<br>Preterm delivery<br>Intrapartum nutrition<br>FHR monitoring<br>Term newborn admitted to NICU<br>Birth companion in labor<br>Free maternal position |
|-----------------------------|-------|-------------------|------------------------------------------------------------------------------------------------------------|------------------------------|----|---------------------------------------------------------------------------------------------------------------------------------------------------------------------------------------------------------------------------------------------------|

Maternal wellbeing  
 Partogram  
 One-to-one midwifery care  
 Place of birth  
 TOLAC  
 Spontaneous delivery  
 Timing of birth  
 Cord clamp  
 Preterm newborn - NICU

|                                       |    |                                                                                                                 |
|---------------------------------------|----|-----------------------------------------------------------------------------------------------------------------|
| Midwifery procedures in the I stage   | // | Interventions I stage<br>Free maternal position<br>One-to-one midwifery care                                    |
| Midwifery procedures in the II stage  | // | Episiotomy<br>Interventions II stage<br>Expulsive contractions<br>Free maternal position                        |
| Midwifery procedures in the III stage | // | Interventions III stage<br>Cord clamp<br>Skin to skin                                                           |
| Midwifery procedures in the IV stage  | // | Perineum<br>Breastfeeding<br>Postpartum hemorrhage<br>Suturing<br>Interventions IV stage<br>Vaginal examination |

|                           |            |                     |                                                                                                                |                      |              |                                                                                                                                            |
|---------------------------|------------|---------------------|----------------------------------------------------------------------------------------------------------------|----------------------|--------------|--------------------------------------------------------------------------------------------------------------------------------------------|
| Nababan et al., 2017 [29] | Bangladesh | Observational study | To examine the effectiveness of the SCC in improving childbirth practices at a district hospital in Bangladesh | Childbirth practices | On admission | Partograph use<br>Appropriate maternal infection management<br>Appropriate eclampsia management<br>Hand hygiene<br>Birth companion present |
|---------------------------|------------|---------------------|----------------------------------------------------------------------------------------------------------------|----------------------|--------------|--------------------------------------------------------------------------------------------------------------------------------------------|

|                         |                            |                     |                                                                                                                                                                                                                                             |                  |                               |                                                                                                                                                                                                                                                                                                                                                                                            |
|-------------------------|----------------------------|---------------------|---------------------------------------------------------------------------------------------------------------------------------------------------------------------------------------------------------------------------------------------|------------------|-------------------------------|--------------------------------------------------------------------------------------------------------------------------------------------------------------------------------------------------------------------------------------------------------------------------------------------------------------------------------------------------------------------------------------------|
|                         |                            |                     |                                                                                                                                                                                                                                             |                  | Intrapartum counseling        |                                                                                                                                                                                                                                                                                                                                                                                            |
|                         |                            |                     |                                                                                                                                                                                                                                             |                  | Just before pushing           | Emergency birth helper was identified<br>Appropriate maternal infection management<br>Appropriate eclampsia management<br>Supplies for mothers and babies                                                                                                                                                                                                                                  |
|                         |                            |                     |                                                                                                                                                                                                                                             |                  | Soon after birth (within 1 h) | Active Management of the third stage of labor<br>Appropriate newborn thermal and resuscitation<br>Maternal blood loss assessment and treatment<br>Appropriate maternal infection management<br>Appropriate eclampsia management<br>Newborn referral<br>Appropriate newborn infection management<br>Newborn special care<br>Breastfeeding and skin-to-skin contact<br>Postpartum counseling |
|                         |                            |                     |                                                                                                                                                                                                                                             |                  | Before discharge              | Maternal blood loss assessment<br>Appropriate maternal infection management<br>Appropriate newborn infection management<br>Newborn feeding assessment<br>Family planning counseling<br>Discharge counseling<br>Follow-up visit counseling                                                                                                                                                  |
| Obara et al., 2014 [28] | WHO Western Pacific Region | Observational study | WHO and the UNICEF Regional Action Plan for Healthy Newborn Infants provide a platform for countries to scale up Early Essential Newborn Care (EENC). The plan emphasizes the creation of an enabling environment for the practice of EENC; | Intrapartum care | All                           | Labour Monitoring (Partograph)<br>Intrapartum care                                                                                                                                                                                                                                                                                                                                         |
|                         |                            |                     |                                                                                                                                                                                                                                             |                  | Preterm and low birth weight  | Elimination of unnecessary inductions and C-sections<br>Antenatal steroids<br>Antibiotics for preterm PROM                                                                                                                                                                                                                                                                                 |
|                         |                            |                     |                                                                                                                                                                                                                                             |                  | Sick newborns                 | Assisted delivery<br>C-section                                                                                                                                                                                                                                                                                                                                                             |
|                         |                            |                     |                                                                                                                                                                                                                                             | Newborn care     | All                           | Drying                                                                                                                                                                                                                                                                                                                                                                                     |

thereby preventing 50.000  
newborn deaths annually

Skin-to-skin contact  
Clamping and cutting the cord appropriately  
Initiating exclusive breastfeeding  
Routine care- eye care, Vitamin K, immunizations, weighing  
and examinations

|                                    |                                                                                             |
|------------------------------------|---------------------------------------------------------------------------------------------|
| Preterm and<br>low birth<br>weight | Kangaroo mother care<br>Breastfeeding support<br>Immediate treatment of suspected infection |
| Sick newborns                      | Resuscitation<br>Antibiotic treatment                                                       |

|                               |       |                     |                                                                                                                                                                                                                                             |                           |    |                                                                                                                                                                                                                                                   |
|-------------------------------|-------|---------------------|---------------------------------------------------------------------------------------------------------------------------------------------------------------------------------------------------------------------------------------------|---------------------------|----|---------------------------------------------------------------------------------------------------------------------------------------------------------------------------------------------------------------------------------------------------|
| Pricilla et al.,<br>2017 [27] | India | Observational study | To describe the quality of the antenatal care provided by nurse midwives of an urban health center concerning low-risk mothers and to document the maternal and early neonatal outcomes of the enrolled mothers during the period of study. | Interpersonal interaction | // | Greetings<br>Politeness<br>Addressing concerns<br>Answering concerns<br>Explaining before examination                                                                                                                                             |
|                               |       |                     |                                                                                                                                                                                                                                             | Physical examination      | // | Gestational age calculated<br>Height measured<br>Weight measured<br>Blood pressure checked<br>Signs of anemia checked<br>Presence of edema examined<br>Fundal height measured<br>Metro gram marked<br>Presentation checked<br>Fetal heart checked |
|                               |       |                     |                                                                                                                                                                                                                                             | Diagnostic tests          | // | Urine albumin/sugar<br>Haemoglobin estimated<br>HIV tested                                                                                                                                                                                        |
|                               |       |                     |                                                                                                                                                                                                                                             | Prophylactic drugs        | // | Tetanus toxoid injection given<br>Iron and folic acid take                                                                                                                                                                                        |



|                                     |       |                     |                                                                                                                                                                         |                     |    |                                                                                                                                                                                                                             |
|-------------------------------------|-------|---------------------|-------------------------------------------------------------------------------------------------------------------------------------------------------------------------|---------------------|----|-----------------------------------------------------------------------------------------------------------------------------------------------------------------------------------------------------------------------------|
| Saturno-Hernández et al., 2019 [26] | Spain | Systematic review   | To systematically review indicators for the central phases of the maternal and child healthcare continuum of care (pregnancy, childbirth, newborn care and postpartum). | Health education    | // | Diet advice on Iron rich food<br>Advice on preparedness for delivery<br>Information about danger signs (maternal and foetal)<br>Breast/nipple care advice<br>Family planning advice                                         |
|                                     |       |                     |                                                                                                                                                                         | Structure           | // | Design, policy, and health system context<br>Human resources and infrastructure<br>Mother, child, family and community context                                                                                              |
|                                     |       |                     |                                                                                                                                                                         | Process             | // | Preventive activities<br>Diagnosis and screening<br>Treatment of pathologic conditions<br>Other maternal and childcare processes                                                                                            |
|                                     |       |                     |                                                                                                                                                                         | Outcome             | // | Maternal mortality<br>Child mortality<br>Maternal morbidity<br>Child morbidity<br>Safety in the care of the mother<br>Safety in childcare<br>Satisfaction<br>Other health outcomes                                          |
| Simpson et al., 2019 [35]           | USA   | Observational study | To describe the development of an adaptation of the MISSCARE Survey to measure missed nursing care in the perinatal setting.                                            | Health determinants | // | Health knowledge and a healthy lifestyle<br>Working and living conditions<br>Environmental and geographic factors<br>Demographics and other health statistics                                                               |
|                                     |       |                     |                                                                                                                                                                         | //                  | // | Assist women to the shower or tub for hydrotherapy<br>Assess the effectiveness of medications<br>Check bladder status/voiding needs every 2 hours<br>Assess pain status every hour<br>A thorough review of prenatal records |

Patient teaching about procedures, tests, and other diagnostic studies  
 Medications administered within 30 minutes before or after the scheduled time  
 Administer oxytocin as per orders or protocol  
 Response to call light is initiated within 5 minutes  
 Emotional support to patient and/or family  
 Patient bathing, skincare, or pedicure  
 Recognize and respond to indeterminate (Category II) or abnormal (Category III) FHR changes within 15 minutes  
 Recognize and respond to excessive uterine activity within 20 minutes  
 Recognize and respond to new maternal complications within 10 min (e.g.hypertension, bleeding)  
 Focused reassessments according to patient condition (e.g., FHR and uterine activity assessment q 15 minutes for women receiving oxytocin for labor induction or augmentation)  
 Real-time or near real-time documentation of maternal-fetal assessments during labor, birth, and recovery  
 Patient teaching about signs and symptoms, when to call after discharge from OB triage  
 Monitor intake and output  
 Provide skin-to-skin mother-baby care immediately after birth  
 Assess vital signs as ordered or per protocol  
 Provide thorough patient handoff  
 Hand washing  
 Breastfeeding within 1 hour after birth for women who are breastfeeding  
 Recovery care consisting of 2 hours of every 15-minute maternal assessment and 2 hours of every 30-minute newborn assessments  
 Notification of physician or nurse-midwife in a timely manner to attend the birth

|                        |       |                     |                                                                             |                  |    |                                                                                                                                    |
|------------------------|-------|---------------------|-----------------------------------------------------------------------------|------------------|----|------------------------------------------------------------------------------------------------------------------------------------|
| Ueda et al., 2019 [34] | Japan | Observational study | To update the quality indicators developed for low-risk labor care in Japan | Pregnancy period | // | Primipara who has enrolled in a childbirth class about antenatal care and delivery by 36 weeks gestation<br>Discussed a birth plan |
|------------------------|-------|---------------------|-----------------------------------------------------------------------------|------------------|----|------------------------------------------------------------------------------------------------------------------------------------|

in 2012, mainly drawing on new or updated clinical practice guidelines and making the process clearly visible and assessable

|                                |    |                                                                                                                                                                                                                                                                                                                                                                                                                                                                                                                                                                                                                                                                                                                                                                                                                                                                                                                                                                                                                                                                          |
|--------------------------------|----|--------------------------------------------------------------------------------------------------------------------------------------------------------------------------------------------------------------------------------------------------------------------------------------------------------------------------------------------------------------------------------------------------------------------------------------------------------------------------------------------------------------------------------------------------------------------------------------------------------------------------------------------------------------------------------------------------------------------------------------------------------------------------------------------------------------------------------------------------------------------------------------------------------------------------------------------------------------------------------------------------------------------------------------------------------------------------|
| Intrapartum period             | // | <p>Initial assessment of labor risk at admission</p> <p>Assessment during the first stage of labor</p> <p>Assessment during the second stage of labor</p> <p>Women with a term, singleton infant in vertex position delivered by cesarean section</p> <p>Women with a term, singleton infant in vertex position delivered by vaginal delivery</p> <p>Women with a term, singleton infant in vertex position delivered by instrumental delivery</p> <p>Women with a term, singleton infant in vertex position delivered by labor induction</p> <p>Term infants with Apgar score less than 7 at five minutes after birth</p> <p>Living infant with birth injuries</p> <p>Respiratory support: resuscitation for asphyxiated term neonate with low oxygen concentrations and oxygen saturation measured by pulse oximetry immediately after birth</p> <p>Women with perineal tears and no perineorrhaphy</p> <p>Second-degree perineal laceration</p> <p>Third fourth-degree perineal laceration</p> <p>Postpartum hemorrhage of more than 500g within 2 hours of birth</p> |
| Within 1 week after childbirth | // | <p>Infant admission to pediatrics department within 1 week after birth (excludes those with congenital anomalies)</p> <p>Infants that were fed only breast milk at the time of discharge from the hospital</p> <p>Peer review of severe adverse events with medical staff</p> <p>The woman switched to receive care provided primarily by obstetricians from the midwifery ward</p> <p>Mother received cessation counseling intervention (including guidance on smoking cessation) if identified as either a tobacco user or passive smoker</p>                                                                                                                                                                                                                                                                                                                                                                                                                                                                                                                          |
| Within 1 month after birth     | // | <p>Infant administered vitamin K three times by one month after birth</p> <p>Infants who had been fed only breast milk at the time of the health examination for children of 1 month of age</p>                                                                                                                                                                                                                                                                                                                                                                                                                                                                                                                                                                                                                                                                                                                                                                                                                                                                          |

|                |    |                                                                                                                                                                                                                                                                                                                                                                                                                                                                                                                                                                                                                                                                                                                                                                                                                                                                                                                                                                                                                                                                                                                                                                                                                                                                                                                                                                                                                                         |
|----------------|----|-----------------------------------------------------------------------------------------------------------------------------------------------------------------------------------------------------------------------------------------------------------------------------------------------------------------------------------------------------------------------------------------------------------------------------------------------------------------------------------------------------------------------------------------------------------------------------------------------------------------------------------------------------------------------------------------------------------------------------------------------------------------------------------------------------------------------------------------------------------------------------------------------------------------------------------------------------------------------------------------------------------------------------------------------------------------------------------------------------------------------------------------------------------------------------------------------------------------------------------------------------------------------------------------------------------------------------------------------------------------------------------------------------------------------------------------|
| New indicators | // | <p>Women receiving antibiotic prophylaxis during childbirth if maternal group B Streptococcus infections are identified at 33 to 37 weeks' gestation</p> <p>Infants are offered the necessary resuscitation in the first minutes after birth, evaluating their condition in line with the Japanese Neonatal Resuscitation Algorithm</p> <p>Women receiving uterotonics for the prevention of postpartum hemorrhage during the third stage of labor</p> <p>Women having early skin-to-skin contact with their babies if they wish, soon after birth in secure surroundings</p> <p>Women planning spontaneous vaginal birth in a midwifery ward and being able to follow that plan</p> <p>Infants are given formula supplementation without medical rationale from birth to discharge in term infants, even though the mother intended to breastfeed</p> <p>Women having a fall during their hospitalization</p> <p>Women and infants readmitted within 30 days of discharge</p> <p>Women being screened for antenatal or postnatal depression using a validated questionnaire</p> <p>Women and infants have complete medical records based on all quality indicators</p> <p>Women have a review of their childbirth experience and support from the midwives and other staff who assisted at the birth.</p> <p>Women have been encouraged and supported to adopt the most comfortable positions throughout the second stage of labor</p> |
|----------------|----|-----------------------------------------------------------------------------------------------------------------------------------------------------------------------------------------------------------------------------------------------------------------------------------------------------------------------------------------------------------------------------------------------------------------------------------------------------------------------------------------------------------------------------------------------------------------------------------------------------------------------------------------------------------------------------------------------------------------------------------------------------------------------------------------------------------------------------------------------------------------------------------------------------------------------------------------------------------------------------------------------------------------------------------------------------------------------------------------------------------------------------------------------------------------------------------------------------------------------------------------------------------------------------------------------------------------------------------------------------------------------------------------------------------------------------------------|
